# Supplementary material for: Chitosan Hydrogel Beads Supported with Ceria for Boron Removal
Source: PubMed Central journal article supplement (PMC6479674; doi:10.3390/ijms20071567), 2019-03-28
Supplement: ijms-20-01567-s001.pdf [file ijms-20-01567-s001.pdf]

## Supplementary materials

Chitosan hydrogel beads supported with ceria for boron removal by Kluczka J. et al.

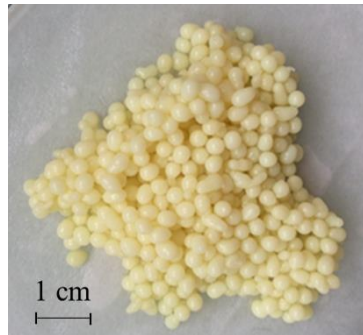

**Figure S1** Photograph of Ce-CTS composite hydrogel beads.

**Table S1** Langmuir, Freundlich, Dubinin-Radushkevich and Temkin models of adsorption isotherms.

| Model | Nonlinear equation                                       | Linear equation                                                           | Plot                                      |
|-------|----------------------------------------------------------|---------------------------------------------------------------------------|-------------------------------------------|
| L     | $q_e = q_m \times \frac{B \times C_e}{1 + B \times C_e}$ | $\frac{1}{q_e} = \frac{1}{q_m \times B \times C_e} + \frac{1}{q_m}$       | $\frac{1}{q_e} \text{ vs } \frac{1}{C_e}$ |
| F     | $q_e = K_F \times (C_e)^{1/n}$                           | $\log(q_e) = \log(k_F) + \frac{1}{n} \log(C_e)$                           | $\log(q_e) \text{ vs } \log(C_e)$         |
| D-R   | $q_e = (X_m) \exp(-k \times \varepsilon^2)$              | $\ln(q_e) = \ln(X_m) - k \times \varepsilon^2$                            | $\ln(q_e) \text{ vs } \varepsilon^2$      |
| T     | $q_e = \frac{R \times T}{b_T} \ln(A_T \times C_e)$       | $q_e = \frac{R \times T}{b_T} \ln(A_T) + \frac{R \times T}{b_T} \ln(C_e)$ | $q_e \text{ vs } \ln(C_e)$                |

where:  $q_m$  (mg/g) and  $B$  (dm<sup>3</sup>/mg) are the Langmuir parameters,  $K_F$  (mg/g) and  $n$  are the parameters resulting from the Freundlich model,  $\varepsilon$ , Polanyi potential,  $x_m$  (mol/g) and the  $k$  (mol<sup>2</sup>/kJ<sup>2</sup>) are the Dubinin-Radushkevich parameters, the parameters  $b_T$  (kJ/mol) and  $A_T$  (dm<sup>3</sup>/mg) are calculated from the T model.

**Table S2** Lagergren pseudo-first-order, Elovich pseudo-second-order, and Weber and Morris parabolic diffusion models of kinetics.

| Kinetic model       | Differential/Nonlinear equation      | Linear equation                                                | Plot                            |
|---------------------|--------------------------------------|----------------------------------------------------------------|---------------------------------|
| Pseudo-first-order  | $\frac{dq_e}{dt} = k_1(q_e - q_t)$   | $\log(q_e - q_t) = \log(q_e) - \frac{k_1 \times t}{2.303}$     | $\log(q_e - q_t) \text{ vs } t$ |
| Pseudo-second-order | $\frac{dq_e}{dt} = k_2(q_e - q_t)^2$ | $\frac{t}{q_t} = \frac{1}{k_2 \times (q_e)^2} + \frac{t}{q_e}$ | $\frac{t}{q_t} \text{ vs } t$   |
| Parabolic diffusion | $q_t = k_p \times t^{1/2}$           | -                                                              | $q_t \text{ vs } t^{1/2}$       |

where  $q_t$  and  $q_e$  are the amounts of boron adsorbed (mg/g) at any time  $t$  and at the time of equilibrium while  $k_1$ ,  $k_2$ , and  $k_p$  are the pseudo-first-order, pseudo-second-order, and the parabolic diffusion rate constants, respectively.
